# Supplementary material
Source: PubMed Central journal article supplement (PMC3390834)
Supplement: 1202885109_pnas.201202885SI.pdf [file 1202885109_pnas.201202885SI.pdf]

# Supporting Information

Baker et al. 10.1073/pnas.1202885109

```
ATGCAGAGCCAACCAGACAATGTGGCGTATCCCATGGAGCTACAAGCGGTTAATAAGGAT 60
GGAACAGTGGAGGTCCTGTTTCAGGGAAACGTTGACACAGTAGCAATGAGCGGTGGGAT 120
GCAGATGTACAAAAACATGAGGTGGCGGAGGCTCAAGAGAAACCCGTGGGAGGCATCAAC 180
TTTTGGGCACCACGGGAACGCGGCTAAATTACCGCGACTACGTTGGCTGAATTTCTGGGA 240
AACTTCGTCTCATATATATCGCTAAGGGCGCGGTTATCACCTCACTACTTGTCCAGAT 300
TTTGGGCTTCTCGGCTTACGATTGGTATTGGTGTGGCTGTCACGATGGCTCTGTATGTT 360
TCACTGGGCATCTCCGGTGGCCATCTCAACTCTGCCGTCACCGTTGGCAATGCGGTTTTTC 420
GGTGATTTCCCTTGGAGAAAAGTCCCGGCTACATCGCGGCGCAGATGCTCGGCACCTTTC 480
CTTGGTGTGCTGCGCTTACGGAGTGTGCTGATCTCCTGAAGGCGCATGGTGGTGGT 540
GAGTTGATTGCCTTCGGTGAAAAGGGGACCGCAGGTGTGTTCAGCACCTACCCAAGGGAT 600
TCAAATGGTCTATTTTCTTGTATCTTTGGTGAGTTTATATGTACGGCGATGCTATTGTTTC 660
TGTGTCTGCGGTATCTTCGACCCCAATAACTCTCCTGCCAAGGGACACGAGCCGTTGGCA 720
GTTGGTGTCTTGTCTTCGCATTTGGCAATAACATCGGTTACTCAACGGGTTACGCAATA 780
AATCCGGCTCGTGACTTCGGTCCCAGGGTCTTCTCTTTCTTTTATGGTGGGGAGGTG 840
N P A R
TTTTACATGCAAATTATTTCTGGGCTCCACTAGTTGTTCCATTCTTTGGAGCTATC 900
CTTGGACTTTTTCTGTACAAATATTTTCTTCCACACTAA 939
```

Fig. S1. The chimeric *AQP2/AQP3* sequence from the KO-B48 strain (GenBank accession no. JX026928). Nucleotides that are identical between *AQP2* and *AQP3* (from the TREU927 reference strain) are in black, nucleotides specific to the *AQP2* sequence are in green, and nucleotides specific to the *AQP3* sequence are in blue. A single nucleotide (C<sup>869</sup>) differed from both the *AQP2* and *AQP3* sequences. The *AQP3*-specific region is boxed. Selectivity filter residues are indicated below the sequence in red and those that differ from *AQP2* are underlined. The *AQP2* nucleotide sequence is identical in the TREU927 reference strain and in the *Listeria* 427 strain (<http://tritrypdb.org>), from which KO-B48 was derived.
